# Supplementary material
Source: PubMed Central journal article supplement (PMC3784305)
Supplement: NIHMS510081-supplement-1_si_001.pdf [file NIHMS510081-supplement-1_si_001.pdf]

## Supporting Information

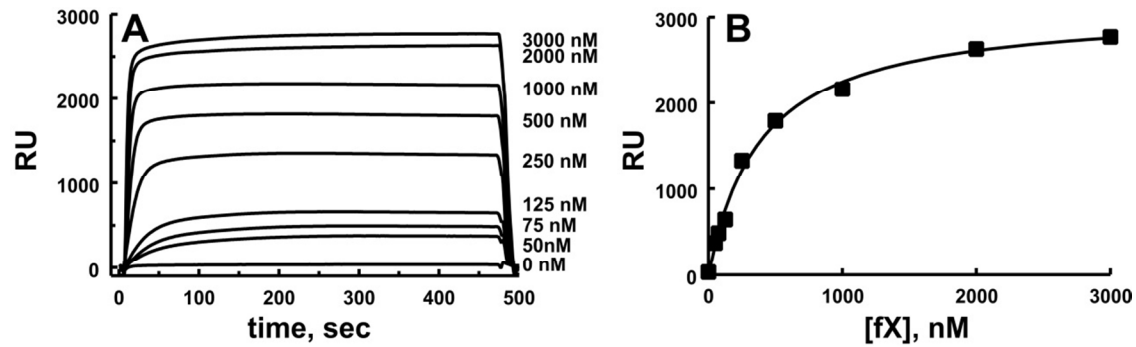

**Figure S1.** (A) A representative set of SPR curves and (B) the corresponding binding isotherm for fX binding to Nanodiscs containing 50% L-PS (balance = 50% PC). Typically, the chip surface was regenerated at the end of each binding experiment (at about 500 sec in this case) by flowing calcium-free buffer over the chip. For each concentration of fX flowed over the chip surface, the maximal steady-state RU values from panel A were plotted in panel B versus fX concentration. The single-site ligand binding equation was fitted to the data in panel B, from which the binding parameters were derived.
